# Supplementary material for: Development of Mechanistic In Vitro–In Vivo Extrapolation to Support Bioequivalence Assessment of Long-Acting Injectables
Source: MDPI journal article supplement (doi:10.3390/pharmaceutics16040552), 2024-04-19
Supplement: s1 [file s1]

## Preclinical predictions - Subcutaneous administration with experimental particle size

**Figure S1.** Plasma concentration time profile following SC administration of MPA LAI in rabbits. Predictions based on measured particle size and no inflammation. Empty squares: observed data (1); Solid line: predicted. RLD: Reference Listed Drug.

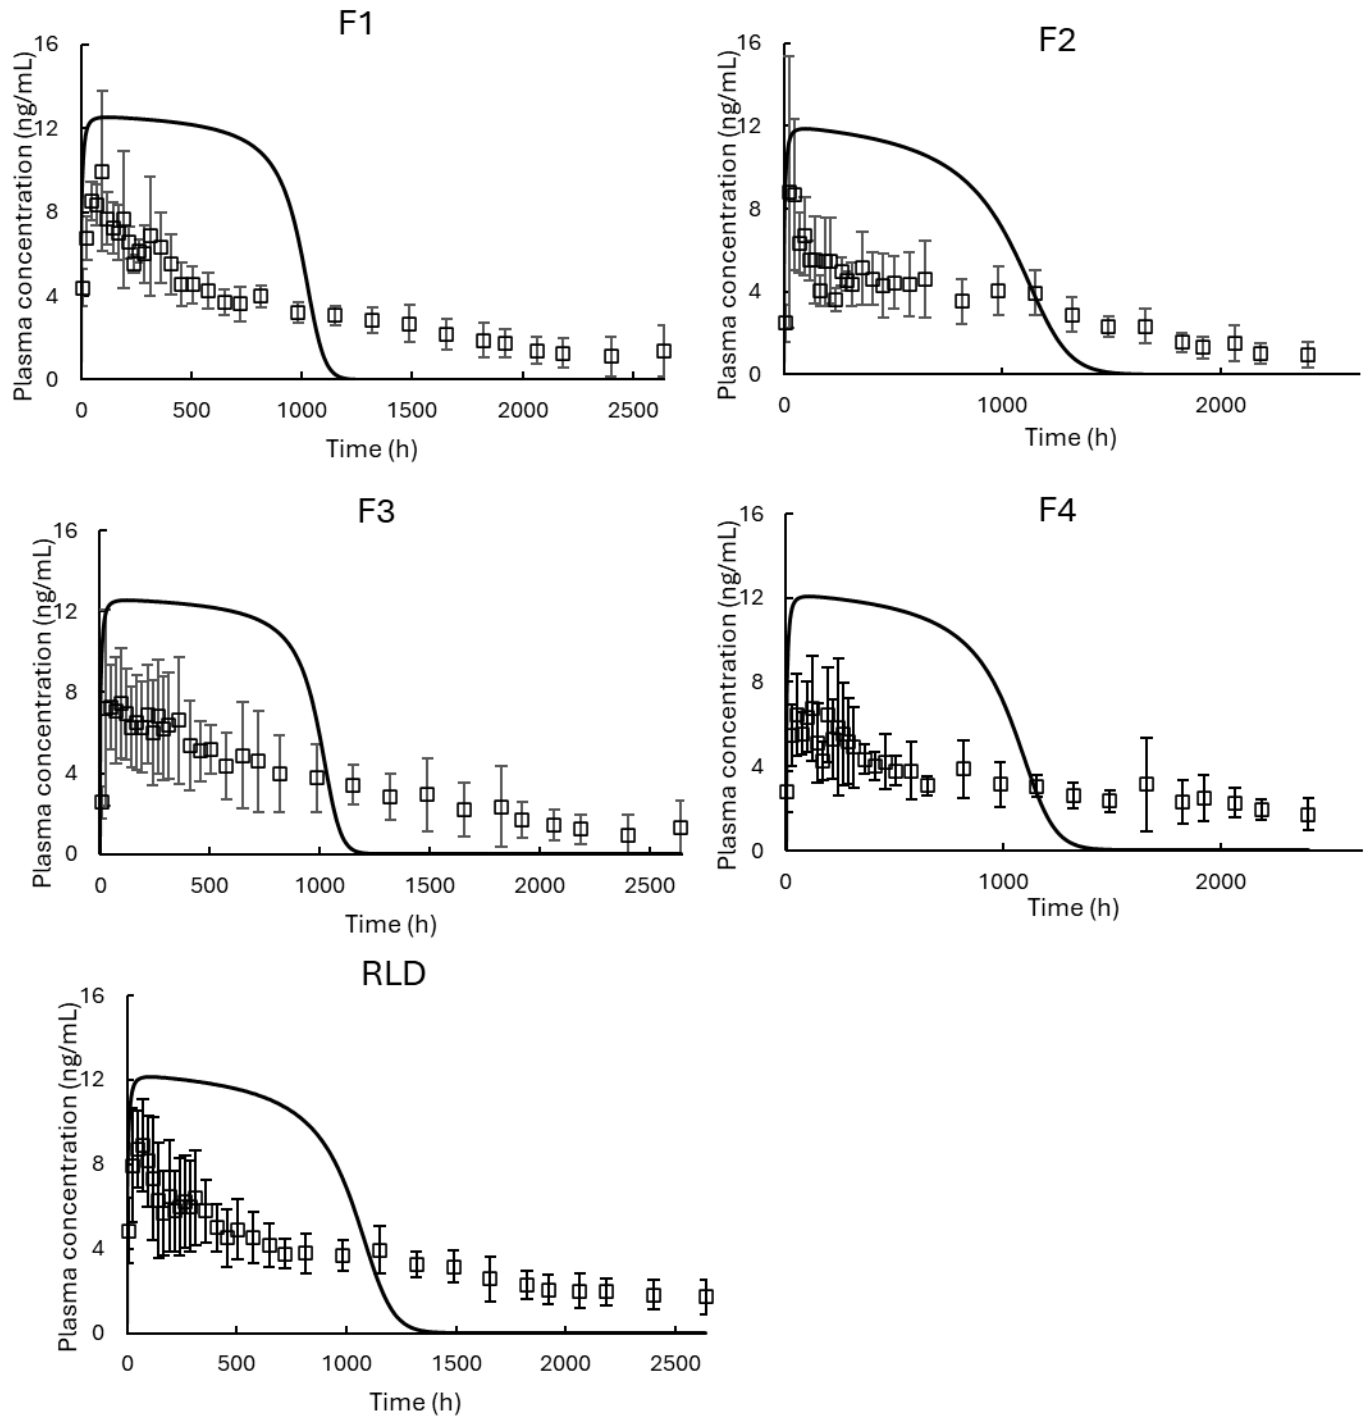

## Reference

1. Bao Q, Wang X, Wan B, Zou Y, Wang Y, Burgess DJ. Development of in vitro-in vivo correlations for long-acting injectable suspensions. *Int J Pharm.* 2023;634:122642.
